# Supplementary material for: Catalytic transfer hydrogenation of ethyl levulinate to γ-valerolactone over supported MoS2 catalysts
Source: Royal Society of Chemistry journal article supplement (doi:10.1039/d1cy00524c), 2021-01-01
Supplement: d1cy00524c1.pdf [file d1cy00524c1.pdf]

*Supporting Information for*

## **Catalytic Transfer Hydrogenation of Ethyl Levulinate to $\gamma$ -valerolactone over Supported MoS<sub>2</sub> Catalysts**

Na Ji<sup>a,b\*</sup>, Xinyong Diao<sup>a</sup>, Zhihao Yu<sup>a</sup>, Zhenyu Liu<sup>a</sup>, Sinan Jiang<sup>a</sup>, Xuebin Lu<sup>a,c</sup>, Chunfeng Song<sup>a</sup>, Qingling Liu<sup>a</sup>, Degang Ma<sup>a</sup>, Caixia Liu<sup>a</sup>

*<sup>a</sup> School of Environmental Science and Engineering, Tianjin Key Lab of Biomass/Wastes Utilization, Tianjin University, 300350, Tianjin, China*

*<sup>b</sup> Guangdong Provincial Key Laboratory of New and Renewable Energy Research and Development, Guangzhou 510640, China*

*<sup>c</sup> Department of Chemistry & Environmental Science, School of Science, Tibet University, Lhasa 850000, China*

### **Corresponding Authors**

\*E-mail: [jina@tju.edu.cn](mailto:jina@tju.edu.cn)

## SECTION S1 SUPPLYMENTARY FIGURES

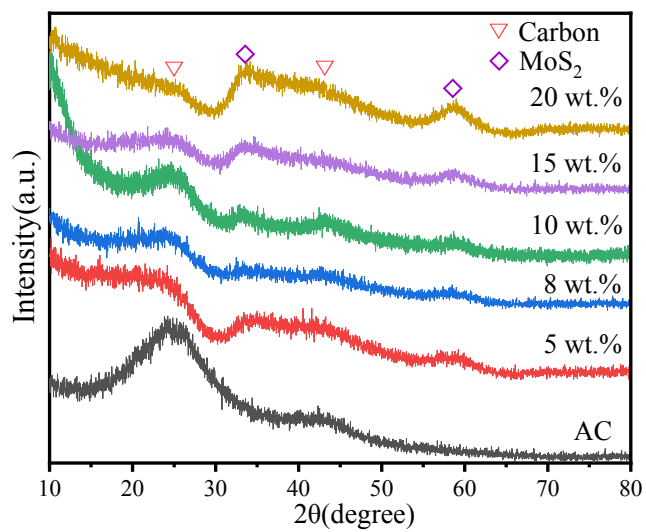

**Fig. S1** XRD patterns of the AC support and MoS<sub>2</sub>/AC catalysts with different Mo loadings.

## SECTION S1 SUPPLYMENTARY FIGURES

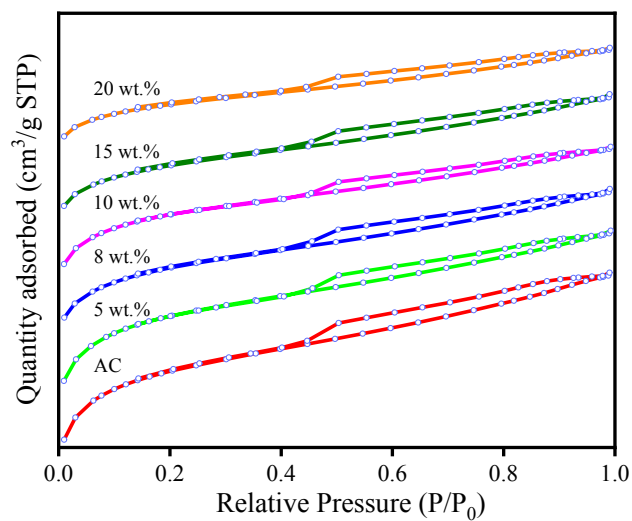

**Fig. S2** Nitrogen adsorption-desorption isotherms of the AC support and MoS<sub>2</sub>/AC catalysts with different Mo loadings.

## SECTION S1 SUPPLYMENTARY FIGURES

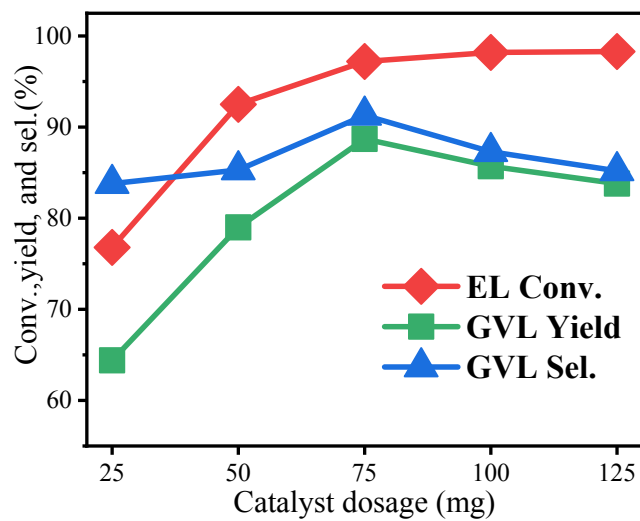

**Fig. S3** Effects of the catalyst dosage on the conversion of EL into GVL. Reaction condition: EL 2 mmol, isopropanol 20 mL, 230 °C, 1.5 h, 1 MPa H<sub>2</sub>.

## SECTION S1 SUPPLYMENTARY FIGURES

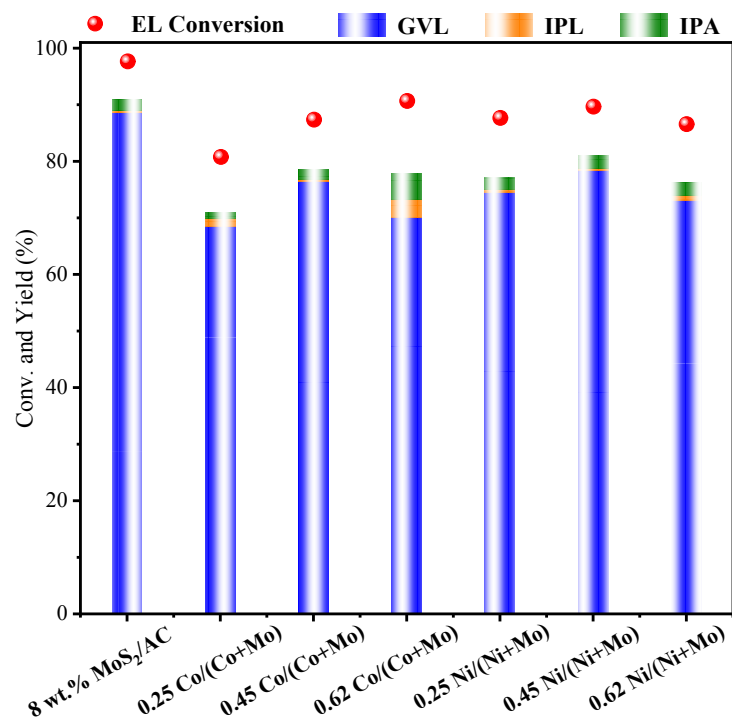

**Fig. S4** Effects of the Co/Ni doping on the conversion of EL into GVL over MoS<sub>2</sub>/AC catalyst. Reaction condition: EL 2 mmol, catalyst 75 mg, isopropanol 20 mL, 230 °C, 1.5 h, 1 MPa H<sub>2</sub>.

## SECTION S1 SUPPLYMENTARY FIGURES

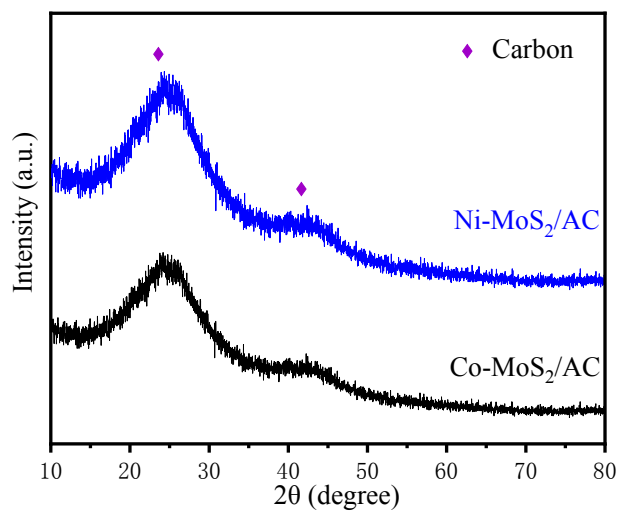

**Fig. S5** XRD patterns of Co-MoS<sub>2</sub> (Co/(Co+Mo)=0.45) and Ni-MoS<sub>2</sub> (Ni/(Ni+Mo)=0.45)

## SECTION S1 SUPPLYMENTARY FIGURES

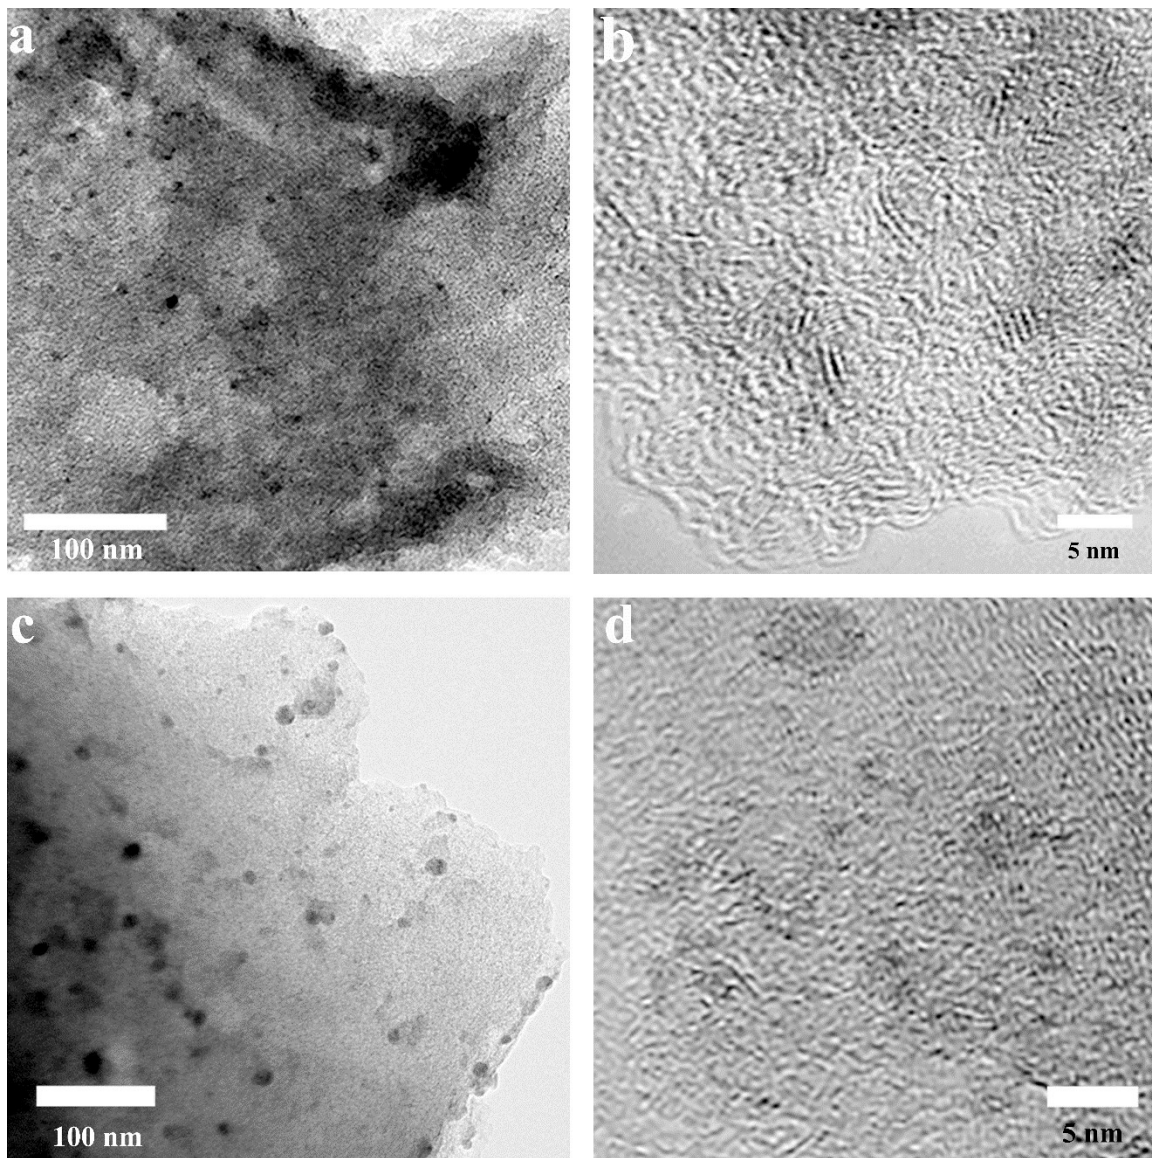

**Fig. S6** TEM images of (a-b) Ni-MoS<sub>2</sub>/AC (Ni/(Ni+Mo) =0.45) and (c-d) Co-MoS<sub>2</sub>/AC (Co/(Co+Mo)=0.45) catalysts.

## SECTION S1 SUPPLYMENTARY FIGURES

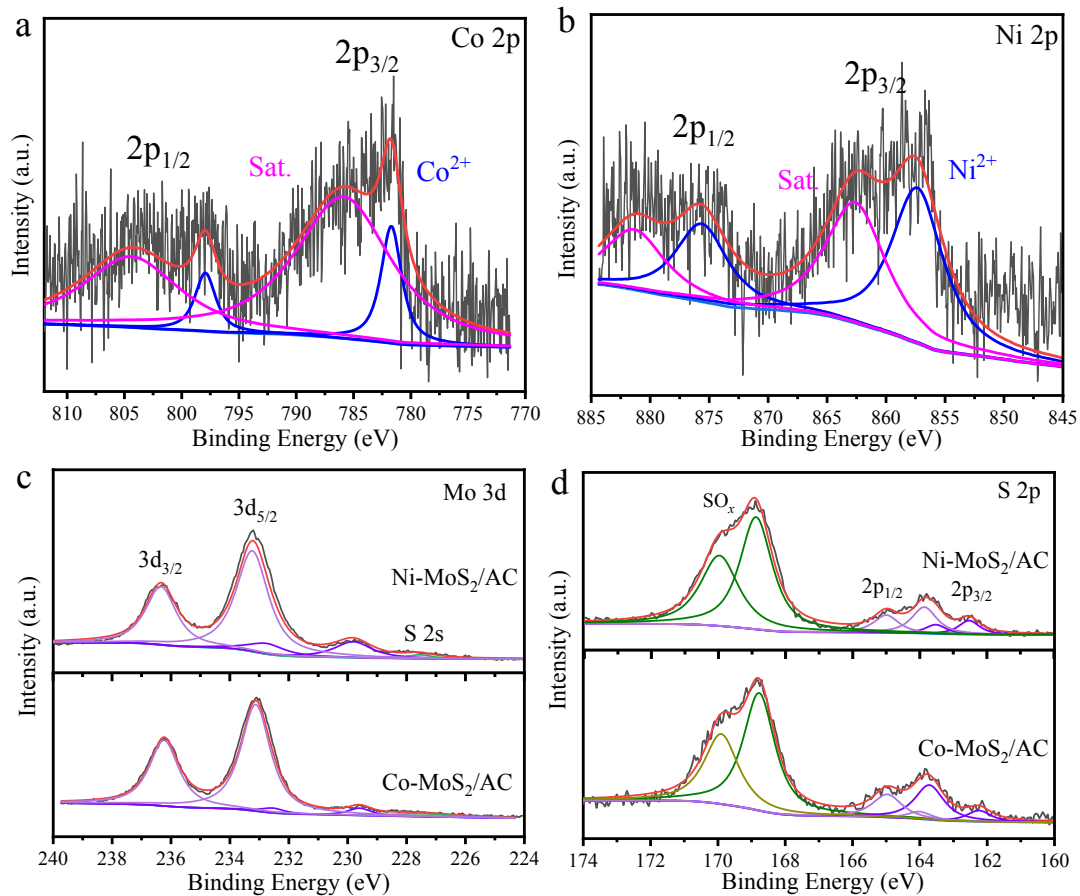

**Fig. S7** XPS spectrum of Co-MoS<sub>2</sub>/AC (Co/(Co+Mo)=0.45) and Ni-MoS<sub>2</sub>/AC (Ni/(Ni+Mo)=0.45) catalysts.



## SECTION S1 SUPPLYMENTARY FIGURES

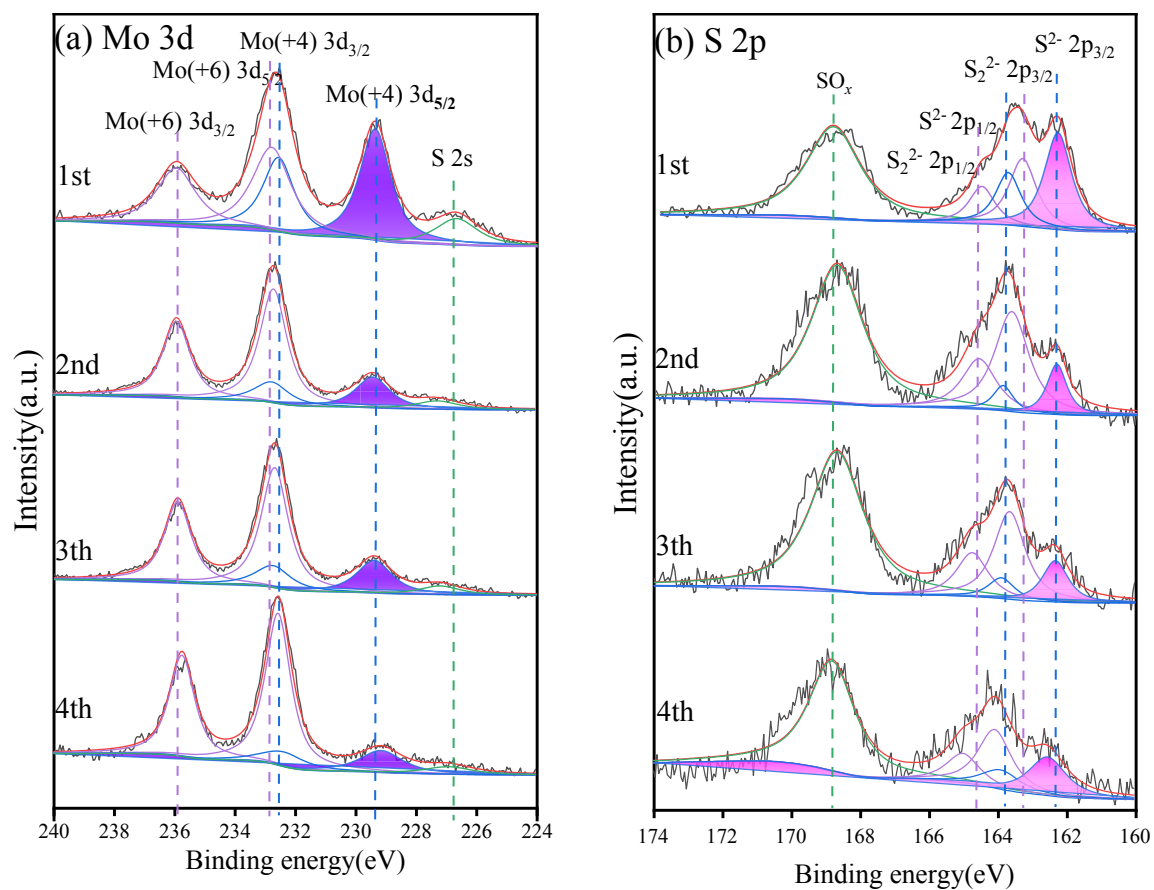

**Fig. S8** XPS spectrum of fresh and spent 8 wt.% MoS<sub>2</sub>/AC catalyst (a) Mo 3d and (b) S 2p.

## SECTION S2 SUPPLYMENTARY TABLES

**Table S1.** Textural properties of activated carbon and MoS<sub>2</sub>/AC catalyst

| Sample                       | BET surface area <sup>a</sup><br>(m <sup>2</sup> /g) | Pore volume<br>(cm <sup>3</sup> /g) | Pore size <sup>b</sup><br>(nm) |
|------------------------------|------------------------------------------------------|-------------------------------------|--------------------------------|
| AC                           | 1161                                                 | 0.39                                | 3.88                           |
| 5 wt.% MoS <sub>2</sub> /AC  | 968                                                  | 0.34                                | 3.87                           |
| 8 wt.% MoS <sub>2</sub> /AC  | 763                                                  | 0.31                                | 3.91                           |
| 10 wt.% MoS <sub>2</sub> /AC | 741                                                  | 0.27                                | 3.89                           |
| 15 wt.% MoS <sub>2</sub> /AC | 618                                                  | 0.27                                | 3.96                           |
| 20 wt.% MoS <sub>2</sub> /AC | 507                                                  | 0.21                                | 3.98                           |

<sup>a</sup>BET surface area. <sup>b</sup>Average pore volume calculated by the BJH method from desorption branches

## SECTION S2 SUPPLYMENTARY TABLES

**Table S2** XPS quantitative analysis of the fresh and spent 8 wt.% MoS<sub>2</sub>/AC catalysts

| Samples | Atomic (%) <sup>a</sup> |      |       |       |
|---------|-------------------------|------|-------|-------|
|         | Mo 3d                   | S 2p | O 1s  | C 1s  |
| 1st     | 1.82                    | 0.97 | 11.28 | 85.93 |
| 2nd     | 1.75                    | 0.63 | 11.96 | 85.65 |
| 3th     | 1.43                    | 0.66 | 11.53 | 86.38 |
| 4th     | 0.8                     | 0.36 | 13.62 | 85.66 |

<sup>a</sup>Calculated from XPS quantitative analysis
